1 **Dietary amino acids and risk of stroke subtypes: a prospective analysis of**  
2 **356,000 participants in seven European countries.**

3

4 Tammy Y.N. Tong<sup>1</sup>, Robert Clarke<sup>2</sup>, Julie A. Schmidt<sup>1,3</sup>, Inge Huybrechts<sup>4</sup>, Urwah Noor<sup>1</sup>,  
5 Nita G. Forouhi<sup>5</sup>, Fumiaki Imamura<sup>5</sup>, Ruth C. Travis<sup>1</sup>, Elisabete Weiderpass<sup>6</sup>, Krasimira  
6 Aleksandrova<sup>7,8</sup>, Christina C. Dahm<sup>9</sup>, Yvonne T. van der Schouw<sup>10</sup>, Kim Overvad<sup>9</sup>, Cecilie  
7 Kyrø<sup>11</sup>, Anne Tjønneland<sup>11</sup>, Rudolf Kaaks<sup>12</sup>, Verena Katzke<sup>12</sup>, Catarina Schiborn<sup>13,14</sup>,  
8 Matthias B. Schulze<sup>13,15</sup>, Ana-Lucia Mayen-Chacon<sup>4</sup>, Giovanna Masala<sup>16</sup>, Sabina Sieri<sup>17</sup>,  
9 Maria Santucci de Magistris<sup>18</sup>, Rosario Tumino<sup>19</sup>, Carlotta Sacerdote<sup>20</sup>, Jolanda M.A. Boer<sup>21</sup>,  
10 W.M. Monique Verschuren<sup>10,21</sup>, Magritt Brustad<sup>22,23</sup>, Therese Haugdahl Nøst<sup>22,24</sup>, Marta  
11 Crous-Bou<sup>25,26</sup>, Dafina Petrova<sup>27-29</sup>, Pilar Amiano<sup>29-31</sup>, José María Huerta<sup>29,32</sup>, Conchi  
12 Moreno-Iribas<sup>29,33</sup>, Gunnar Engström<sup>34</sup>, Olle Melander<sup>34,35</sup>, Kristina Johansson<sup>36</sup>, Kristina  
13 Lindvall<sup>37</sup>, Elom K. Aglago<sup>38</sup>, Alicia K. Heath<sup>38</sup>, Adam S. Butterworth<sup>39-42</sup>, John Danesh<sup>39-43</sup>,  
14 Timothy J. Key<sup>1</sup>

15

16 **Affiliations:**

- 17 1. Cancer Epidemiology Unit, Nuffield Department of Population Health, University of Oxford, Oxford,  
18 United Kingdom
- 19 2. Clinical Trial Service Unit and Epidemiological Studies Unit, Nuffield Department of Population Health,  
20 Oxford, United Kingdom
- 21 3. Department of Clinical Epidemiology, Department of Clinical Medicine, Aarhus University Hospital and  
22 Aarhus University, Aarhus, Denmark.
- 23 4. Nutrition and Metabolism Branch, International Agency for Research on Cancer (IARC), World Health  
24 Organization (WHO), Lyon, France.

- 25 5. MRC Epidemiology Unit, University of Cambridge School of Clinical Medicine, Cambridge, United  
26 Kingdom
- 27 6. International Agency for Research on Cancer (IARC), World Health Organization (WHO), Lyon, France.
- 28 7. Department Epidemiological Methods and Etiological Research, Leibniz Institute for Prevention Research  
29 and Epidemiology - BIPS, Bremen, Germany.
- 30 8. Faculty of Human and Health Sciences, University of Bremen, Grazer Straße 2, 28359, Bremen, Germany.
- 31 9. Department of Public Health, Aarhus University, Aarhus, Denmark.
- 32 10. Julius Center for Health Sciences and Primary Care, University Medical Center Utrecht, Utrecht University,  
33 Utrecht, The Netherlands.
- 34 11. Danish Cancer Society Research Center, Copenhagen, Denmark.
- 35 12. Division of Cancer Epidemiology, German Cancer Research Center (DKFZ), Heidelberg, Germany.
- 36 13. Department of Molecular Epidemiology, German Institute of Human Nutrition Potsdam-Rehbruecke,  
37 Nuthetal, Germany.
- 38 14. German Center for Diabetes Research (DZD), Neuherberg, Germany
- 39 15. Institute for Nutritional Science, University of Potsdam, Nuthetal, Germany.
- 40 16. Institute for cancer research, prevention and clinical network (ISPRO), Florence, Italy.
- 41 17. Epidemiology and Prevention Unit, Fondazione IRCCS Istituto Nazionale dei Tumori di Milano, Milan,  
42 Italy
- 43 18. Azienda Ospedaliera Universitaria Federico II, Napoli, Italy.
- 44 19. Hyblean Association for Epidemiological Research AIRE-ONLUS, Ragusa, Italy.
- 45 20. Unit of Cancer Epidemiology, Città della Salute e della Scienza University-Hospital, Turin, Italy.
- 46 21. National Institute for Public Health and the Environment, Bilthoven, the Netherlands.
- 47 22. Department of Community Medicine, Faculty of Health Sciences, UiT The Arctic University of Norway,  
48 Tromsø, Norway.
- 49 23. The Public Dental Service Competence Centre of Northern Norway (TkNN), Tromsø, Norway.
- 50 24. K.G. Jebsen Centre for Genetic Epidemiology, Department of Public Health and Nursing, Norwegian  
51 University of Science and Technology, Trondheim, Norway,
- 52 25. Unit of Nutrition and Cancer, Cancer Epidemiology Research Program, Catalan Institute of Oncology  
53 (ICO) - Bellvitge Biomedical Research Institute (IDIBELL). L'Hospitalet de Llobregat, Barcelona, Spain.
- 54 26. Department of Epidemiology, Harvard T.H. Chan School of Public Health. Boston, MA, USA.

- 55 27. Escuela Andaluza de Salud Pública (EASP), Granada, Spain
- 56 28. Instituto de Investigación Biosanitaria ibs.GRANADA, Granada, Spain
- 57 29. Centro de Investigación Biomédica en Red de Epidemiología y Salud Pública (CIBERESP), Instituto de  
58 Salud Carlos III, C. de Melchor Fernández Almagro, Madrid, Spain.
- 59 30. Ministry of Health of the Basque Government, Sub Directorate for Public Health and Addictions of  
60 Gipuzkoa, San Sebastian, Spain.
- 61 31. Biodonostia Health Research Institute, Epidemiology of Chronic and Communicable Diseases Group, , San  
62 Sebastián, Spain.
- 63 32. Department of Epidemiology, Murcia Regional Health Council, IMIB-Arrixaca, Murcia, Spain.
- 64 33. Navarra Institute for Health Research (IdiSNA), Pamplona, Spain Instituto de Salud Pública de Navarra,  
65 IdiSNA, Navarre Institute for Health Research, Pamplona, Spain
- 66 34. Department of Clinical Science in Malmö, Lund University, Clinical Research Center, Malmö, Sweden.
- 67 35. Department of Emergency and Internal Medicine, Skåne University Hospital, Malmö, Sweden.
- 68 36. Department of Public Health and Clinical medicine, Umeå University, Umeå, Sweden
- 69 37. Department of Epidemiology and Global Health, Umeå University, Umeå, Sweden
- 70 38. Department of Epidemiology and Biostatistics, School of Public Health, Imperial College London, London,  
71 United Kingdom.
- 72 39. British Heart Foundation Cardiovascular Epidemiology Unit, Department of Public Health and Primary  
73 Care, University of Cambridge, Cambridge, United Kingdom.
- 74 40. National Institute for Health Research Blood and Transplant Research Unit in Donor Health and Genomics,  
75 University of Cambridge, Cambridge, United Kingdom.
- 76 41. British Heart Foundation Centre of Research Excellence, University of Cambridge, Hills Road, Cambridge,  
77 United Kingdom.
- 78 42. Health Data Research UK Cambridge, Wellcome Genome Campus and University of Cambridge, United  
79 Kingdom.
- 80 43. Department of Human Genetics, Wellcome Sanger Institute, Hinxton, United Kingdom.
- 81
- 82 Corresponding author: Dr Tammy Y.N. Tong ([tammy.tong@ndph.ox.ac.uk](mailto:tammy.tong@ndph.ox.ac.uk))  
83 Nuffield Department of Population Health, University of Oxford, Richard Doll Building, Old  
84 Road Campus, Oxford OX3 7LF, UK

85 **Abstract**

86 *Background:* Previously reported associations of protein-rich foods with stroke subtypes have  
87 prompted interest in assessment of individual amino acids. We examined the associations of  
88 dietary amino acids with risks of ischaemic and haemorrhagic stroke in the EPIC study.

89 *Methods:* We analysed data on 356,142 participants from seven European countries. Dietary  
90 intakes of 19 individual amino acids were assessed using validated country-specific dietary  
91 questionnaires, calibrated using additional 24-hour dietary recalls. Multivariable-adjusted  
92 Cox regression models were used to estimate hazard ratios (HRs) and 95% confidence  
93 intervals (CIs) of ischaemic and haemorrhagic stroke in relation to intake of each amino acid.  
94 The role of blood pressure as a potential mechanism was assessed in 267,642 (75%)  
95 participants.

96 *Results:* After a median follow-up of 12.9 years, 4,295 participants had an ischaemic stroke  
97 and 1,375 participants had a haemorrhagic stroke. After correction for multiple testing, higher  
98 intake of proline (as percent of total protein) was associated with 12% lower risk of  
99 ischaemic stroke (HR per 1 SD higher intake 0.88; 95% CI 0.82, 0.94). The association  
100 persisted after mutual adjustment for all other amino acids, systolic and diastolic blood  
101 pressure. The inverse associations of isoleucine, leucine, valine, phenylalanine, threonine,  
102 tryptophan, glutamic acid, serine and tyrosine with ischaemic stroke were each attenuated  
103 with adjustment for proline intake. For haemorrhagic stroke, no statistically significant  
104 associations were observed in the continuous analyses after correcting for multiple testing.

105 *Conclusion:* Higher proline intake was associated with a lower risk of ischaemic stroke,  
106 independent of other dietary amino acids and blood pressure.

107 **Keywords:** amino acids, dietary protein, ischaemic stroke, haemorrhagic stroke, nutritional  
108 epidemiology, prospective cohort

## 109 **Background**

110 While stroke is the second leading cause of death worldwide, the incidence of stroke varies  
111 substantially between countries reflecting differences in risk factors including variations in  
112 dietary intakes [1]. Differences in dietary protein has been suggested to be important, but  
113 previous studies of the associations of dietary protein intake with risk of stroke have reported  
114 conflicting results, possibly reflecting heterogeneity by pathological stroke types and dietary  
115 sources of protein [2, 3]. The different sources of dietary protein reflect a different profile of  
116 individual dietary amino acids. For example, meat and meat products are a main source of the  
117 essential amino acids and glycine, while grain products are a main source of dietary cysteine  
118 [4]. A previous prospective study reported an inverse association of dietary cysteine with risk  
119 of total stroke [5], and another reported an inverse association of glutamic acid but positive  
120 association of glycine with stroke mortality [6], but overall there is very limited evidence on  
121 the topic. Moreover, it is unclear whether the absolute quantity or the proportions of each  
122 individual dietary amino acid (i.e. protein quality) that make up total dietary protein would be  
123 more relevant for health. The two main stroke subtypes (ischaemic and haemorrhagic) also  
124 have different dietary [7] and non-dietary (including genetic) risk factors [8, 9], which  
125 highlights the importance of examining stroke subtypes separately. For example, previous  
126 analyses in EPIC (the European Prospective Investigation into Cancer and Nutrition) reported  
127 inverse associations of ischaemic stroke with consumption of fruit and vegetables, dietary  
128 fibre and dairy products, while the risk of haemorrhagic stroke was positively associated with  
129 egg consumption [7]. Therefore, any associations with dietary amino acids are likely to vary  
130 by stroke type.

131 The aim of the present study was to assess the associations of both absolute and relative  
132 quantities of individual dietary amino acids with risk of stroke subtypes in a prospective  
133 study of 356,000 participants from seven European countries. Additionally, we aimed to

134 assess if these associations were independent of blood pressure, the major risk factor for both  
135 subtypes of stroke.

136

## 137 **Methods**

### 138 *Study population*

139 The present analyses involved 356,142 participants recruited from 20 centres between 1992  
140 and 2000 in seven European countries (Denmark, Germany, Italy, the Netherlands, Spain,  
141 Sweden, and the UK), who participated in the EPIC study. Details of the study design have  
142 been described previously [10, 11]. The inclusion and exclusion criteria for the present study  
143 are shown in Supplementary figure 1. All participants provided written informed consent, and  
144 the study protocol was approved by the ethical review board of IARC and the institutions  
145 where the participants were recruited [10].

146

### 147 *Data collection*

148 At recruitment all participants completed questionnaires on medical history and socio-  
149 demographic factors, as well as validated country-specific dietary questionnaires (mostly  
150 food frequency questionnaires or diet histories) which asked about diet in the previous year  
151 [10]. In addition, a stratified random sample of 8% of participants across all centres also  
152 completed a standardised and computerised 24-hour recall, on average ~1.4 years after  
153 recruitment, which was used to calibrate the dietary exposures to reduce between-centre  
154 heterogeneity and to correct for measurement error [12, 13]. The calibration method and  
155 rationale have been described previously [7, 12, 13].

156 Based on reported dietary intakes in both the baseline dietary questionnaires and 24-hour  
157 recalls, estimates of individual dietary amino acids were derived by matching to the National  
158 Nutrient Database for Standard Reference of the United States (developed at the United  
159 States Department of Agriculture, or USDA) food composition tables, and appended to the  
160 EPIC Nutrient Database. The matching and validation process has been reported in detail  
161 [14]. USDA estimates of dietary amino acids were used because the equivalent estimates  
162 were not available from all ten national Food Composition Databases that were originally  
163 used in EPIC. Altogether, both calibrated and observed estimates were available for the  
164 intakes of 19 individual dietary amino acids. Of the 20 standard amino acids, glutamine and  
165 asparagine were not available as these two amino acids were affected by deamination  
166 reactions during the acid hydrolysis process used to compile the USDA database [15, 16].  
167 Cystine (two cysteine molecules joined by a disulfide bond) [17] was estimated instead of  
168 cysteine, while hydroxyproline, which is not a standard amino acid, was also estimated. The  
169 sums of branched-chain amino acids (isoleucine, leucine, valine), other essential amino acids  
170 (histidine, lysine, methionine, phenylalanine, threonine and tryptophan) and non-essential  
171 amino acids (alanine, arginine, aspartic acid, cystine, glutamic acid, glycine, hydroxyproline,  
172 proline, serine and tyrosine) were also calculated.

173 The primary outcomes were ischaemic stroke (ICD 9 433-434 or ICD 10 I63) and  
174 haemorrhagic stroke (ICD 9 430-431 or ICD 10 I60-I61). In addition, we also considered  
175 intracerebral haemorrhage (ICD 9 431 or ICD 10 I61) and subarachnoid haemorrhage (ICD 9  
176 430 or ICD 10 I60) as separate outcomes. Both non-fatal and fatal incident events were  
177 considered, and details of the ascertainment process and validation methods have been  
178 previously reported [7, 11]. Details on the data collection for blood pressure (available for  
179 most of the cohort) and other covariates have also been reported previously [7, 11].

180

181 *Statistical analyses*

182 Cohort characteristics and dietary intakes of amino acids at baseline were summarised as  
183 means (SD), median (25<sup>th</sup>, 75<sup>th</sup> percentile) or absolute numbers (%). Spearman correlation  
184 coefficients were estimated between the individual dietary amino acids, and also for dietary  
185 amino acids with dietary protein and food sources of protein. Intakes of dietary amino acids  
186 were expressed in three different ways, primarily as individual amino acids modelled as a  
187 percentage of total protein intake (% of total protein), and secondarily as individual amino  
188 acids modelled as grams per day (g/day) and grams per 1000 kcal (g/1000 kcal). The three  
189 approaches tested the hypotheses that the relative protein quality or protein makeup, the  
190 absolute quantity of amino acids, and the relative quantity of amino acids to overall diet were  
191 relevant to risk of stroke. The primary approach of expressing amino acids as a percentage of  
192 total protein was selected since this approach was less susceptible to collinearity with other  
193 dietary variables [18]. Because the sum of the individual amino acids did not add up to 100%  
194 of total protein (mean=86.2%, partly because glutamine and asparagine were missing), we  
195 included post hoc analyses expressing the amino acids as a percentage of the sum of all  
196 available amino acids. The associations of total dietary protein with stroke risk were also  
197 assessed, by expressing protein in g/day and g/1000 kcal.

198 Using multivariable-adjusted Cox regression, we assessed the hazard ratios (HRs) and 95%  
199 confidence intervals (CIs) for sex-specific SD differences in calibrated intakes of each dietary  
200 amino acid, and sex-specific SD differences and sex-specific fifths of observed intakes. For  
201 each association, a test of trend was estimated by fitting the calibrated or observed intake of  
202 each amino acid as a continuous variable when modelling per SD differences, or by fitting the  
203 median values of each fifth as a pseudo-continuous variable when modelling differences by  
204 fifths of intake. Tests of non-linearity were performed by using a likelihood-ratio test to



205 compare models with the exposure fitted as a continuous variable versus a categorical  
206 variable (fifths of intake), based on the observed intake.

207 The underlying time variable for the Cox regression was age at recruitment to age at  
208 diagnosis, death or administrative censoring. All analyses were stratified by sex and EPIC  
209 centre, and adjusted for age at recruitment (continuous, Model 1). Model 2 additionally  
210 adjusted for total energy intake (continuous, calibrated or observed intake based on USDA  
211 estimates). Model 3 additionally adjusted for smoking status and intensity (never, former,  
212 current<10, 10-19, 20+ cigarettes/day, unknown), current calibrated or observed alcohol  
213 consumption (non-drinker (<0.1), 0.1-4.9, 5.0-14.9, 15-29.9, 30-59.9, 60+ g/day based on  
214 USDA estimates), physical activity (inactive, moderately inactive, moderately active, active,  
215 unknown), employment status (employed or student, neither employed nor student, unknown)  
216 and level of education completed (none or primary, secondary, vocational or university,  
217 unknown). Model 4 additionally adjusted for self-reported history of diabetes (yes, no,  
218 unknown), prior hypertension (yes, no, unknown) and prior hyperlipidaemia (yes, no,  
219 unknown). Model 5 additionally adjusted for body mass index (<22.5, 22.5-24.9, 25.0-27.4,  
220 27.5-29.9,  $\geq 30.0$  kg/m<sup>2</sup>, unknown), and was considered the main model in these analyses. As  
221 total energy intake was held constant (i.e. adjusted for) in the regression model, a higher  
222 intake of any individual amino acid, which contributes to total energy, would result in a  
223 simultaneously lower intake of some other energy-providing foods or nutrients [19].  
224 Therefore, in model 6, we removed the adjustment for total energy intake thus allowing the  
225 comparison of the results with (Model 5) and without (Model 6) a theoretical substitution  
226 effect of the amino acid of interest for an unspecified energy-providing source. To further  
227 assess the influence of major macronutrients and to allow the interpretation of the findings  
228 when holding total protein intake constant, we fitted an additional model based on Model 6  
229 (without energy intake), but with the inclusion of intakes of total protein (continuous), total

230 carbohydrates (continuous), saturated fats (continuous) and unsaturated fats (continuous).  
231 Likelihood-ratio  $\chi^2$  statistics were estimated at each adjustment level (for models 1-6) by  
232 comparing regression models with and without inclusion of the amino acids of interest using  
233 a likelihood ratio test [20]. The proportional hazards assumption was assessed using  
234 Schoenfeld residuals. The assumption was not met for two covariates in the models for  
235 ischaemic stroke (history of diabetes and prior hypertension) and for haemorrhagic stroke  
236 (prior hypertension and BMI). However, fitting these covariates as stratifying variables  
237 fulfilled the assumption and yielded close to identical estimates as adjusting, so they were  
238 retained as adjustment variables.

239 To investigate whether the observed associations for the amino acids were independent from  
240 the other amino acids, we included additional models mutually adjusting for each of the other  
241 dietary amino acids, one at a time. We also included post-hoc analyses adjusting the amino  
242 acids that remain significant across different models for its major food sources. To assess  
243 whether the associations were independent of blood pressure, we estimated the adjusted mean  
244 systolic and diastolic blood pressure by fifths of each dietary amino acid in the subset of  
245 participants with blood pressure measurements (n=267,642), using the same covariate  
246 adjustments as above. Additionally, we repeated the Cox regression analyses in this subset  
247 (based on Model 5), with and without further adjustment for systolic or diastolic blood  
248 pressure.

249 As secondary analyses, we repeated the main analyses for the two subtypes of haemorrhagic  
250 stroke (intracerebral haemorrhage and subarachnoid haemorrhage). To assess potential  
251 heterogeneity of the associations by subgroups of the major confounders and to assess  
252 residual confounding, we also examined the results stratified by age at recruitment (<55, 55-  
253 64,  $\geq 65$  years), sex, BMI (<25, 25-29.9,  $\geq 30$  kg/m<sup>2</sup>), smoking status (never, former, current  
254 smokers), alcohol drinking (non-drinkers, moderate drinkers <15g/day, heavy drinkers

255  $\geq 15\text{g/day}$ ) and history of diseases (as a dichotomy of no disease history vs history of diabetes,  
256 hypertension or hyperlipidaemia). We also examined the associations based on observed  
257 intakes stratified by EPIC country and pooled using a meta-analysis approach. Tests of  
258 heterogeneity of trend between subgroups were conducted by comparing the risk coefficients  
259 in each subgroup using inverse variance weighting, testing for statistical significance with a  
260  $\chi^2$  test on  $k-1$  degrees of freedom, where  $k$  is the number of subgroups. To assess whether the  
261 overall results might be influenced by reverse causation, we repeated the analyses for  
262 ischaemic and haemorrhagic stroke after excluding the first four years of follow-up. A  
263 complete case analysis was also performed to assess the potential influence of missing  
264 covariates, which were coded as a missing category in the main analyses.

265 All tests for statistical significance were two sided. Conventional p-values are reported, but  
266 results were interpreted with consideration of multiple testing. To account for multiple testing  
267 while allowing for correlation between the exposures, we conducted a principal component  
268 analysis of the exposure variables, and determined that the first four principal components  
269 explained 99% of the total variation in the exposure data [21, 22]. Consequently, the effective  
270 number of independent tests was determined to be four, and the statistical significance level  
271 after Bonferroni correction for multiple testing based on this number was defined as  
272  $0.05/4=0.0125$ . All analyses were performed using Stata version 17.0 (StataCorp, TX, USA).  
273 All figures were generated using “Jasper makes plots” package [23] version 2-266 in R  
274 version 4.2.1.

275

## 276 **Results**

277 *Baseline and dietary characteristics*

278 The baseline characteristics of the study participants are shown in Table 1 and additionally in  
279 detail in Supplementary table 1. Intakes of dietary amino acids, total protein and total energy  
280 are shown by sex in Supplementary table 2, and by EPIC country in Supplementary table 3.  
281 The Spearman correlation coefficients between the individual dietary amino acids are shown  
282 in Supplementary figure 2, and for amino acids with dietary protein and food sources of  
283 protein in Supplementary figures 3 and 4 respectively.

284

#### 285 *Associations of dietary amino acids with stroke risk*

286 After a median follow-up of 12.9 years, there were 4,295 cases of ischaemic stroke and 1,375  
287 cases of haemorrhagic stroke among 356,142 participants (4,529,626 person-years in total).  
288 In the fully adjusted models, associations between dietary amino acids and risks of ischaemic  
289 and haemorrhagic stroke were numerically similar irrespective of whether the amino acids  
290 were expressed as a percentage of total protein (Figure 1, Supplementary tables 4-5), in g/day  
291 (Supplementary figure 5, Supplementary tables 4-5), g/1000 kcal (Supplementary figure 6,  
292 Supplementary tables 4-5), or as a percentage of total amino acids (Supplementary figure 7,  
293 Supplementary tables 4-5). Unless otherwise stated, the primary results reported on the  
294 associations that remained statistically significant after correcting for multiple testing, or  
295 results from categorical analyses where we observed non-linear associations.

296 When expressing the amino acids as a percentage of total protein, in the fully adjusted models  
297 (Model 5) we found inverse associations of ischaemic stroke for each 1 SD higher calibrated  
298 intake of total and individual branched-chain amino acids (HR [95% CI] per SD higher of  
299 total: 0.93 [0.88, 0.98], isoleucine: 0.93 [0.88, 0.98], leucine: 0.93 [0.87, 0.98], valine: 0.92  
300 [0.88, 0.97]), phenylalanine (0.92 [0.87, 0.98]), threonine (0.93 [0.88, 0.99]), tryptophan  
301 (0.94 [0.89, 0.99]), total non-essential amino acids (0.92 [0.87, 0.98]), glutamic acid (0.90

302 [0.84, 0.96]), proline (0.88 [0.82, 0.94]), serine (0.92 [0.88, 0.97]) and tyrosine (0.92 [0.88,  
303 0.98]) (Figure 1). Glycine showed a non-linear association with ischaemic stroke in the  
304 categorical analysis (HR [95% CI] 1.28 [1.14, 1.43] for top versus bottom fifth, p non-  
305 linearity<0.001), but only when expressing glycine as a percentage of estimated intakes of  
306 total protein or total amino acids (Supplementary table 4). For haemorrhagic stroke, no  
307 statistically significant associations were observed in the continuous analyses after correcting  
308 for multiple testing (Figure 1). In categorical analyses, lower risks were observed from the  
309 second to top fifth of proline intake compared to bottom fifth (top versus bottom fifth: 0.72  
310 [0.58, 0.90], p-trend across categories=0.006, Supplementary table 5). No statistically  
311 significant associations were observed for total protein with either ischaemic or haemorrhagic  
312 stroke (Supplementary figures 4-5, Supplementary tables 4-5), or in any analyses examining  
313 the two haemorrhagic stroke subtypes as outcomes (Supplementary table 6). Results from the  
314 different covariate adjustment models are shown in Supplementary tables 7-9.

315

#### 316 *Mutual adjustment of dietary amino acids*

317 Results with mutual adjustment for each of the other amino acids for the ten amino acids that  
318 were inversely associated with ischaemic stroke risk, as reported above, are shown in Figure  
319 2 (for the five amino acids that were significantly associated in both the calibrated and  
320 observed analyses) and in Supplementary figure 8 (for the five amino acids that were  
321 significantly associated in the calibrated analyses only). The inverse associations for proline  
322 persisted after adjustment for all other amino acids, but the associations for other amino acids  
323 were attenuated upon adjustment for proline. However, the higher risk of ischaemic stroke  
324 comparing top to bottom fifth of glycine intake remained with adjustment for proline (1.27  
325 [1.12, 1.43], results not shown in tables). In post-hoc analyses, the inverse associations for

326 proline with ischaemic stroke remained upon mutual adjustment for its different food sources  
327 (e.g. 0.89; 0.83, 0.96 after mutual adjustment for cheese, with no significant association for  
328 cheese in the same model, results not shown in tables). Based on these findings, the changes  
329 in the HRs and likelihood ratio  $\chi^2$  statistics for proline are also depicted graphically in Figure  
330 3, by each level of covariate adjustment.

331

### 332 *Assessment of role of blood pressure*

333 The adjusted mean levels of systolic and diastolic blood pressure across fifths of dietary  
334 amino acids are shown in Supplementary tables 10-11. Across all amino acids, higher intakes  
335 were associated with higher blood pressure, though the differences were very small (up to 1  
336 mmHg difference in most cases). As expected from these small differences, the results for  
337 both ischaemic and haemorrhagic stroke were almost unchanged after further adjustment for  
338 either systolic or diastolic blood pressure (Supplementary table 12).

339

### 340 *Sensitivity analyses*

341 In stratified analyses, the main findings were consistent between subgroups of age, sex, BMI,  
342 smoking status, alcohol drinking and disease status for both ischaemic and haemorrhagic  
343 stroke (Supplementary tables 13-24). The pooled estimates by country using a meta-analysis  
344 approach were similar (Supplementary tables 25-26), and results were consistent after  
345 excluding the first four years of follow-up (Supplementary table 27) or based on a complete  
346 case analysis (Supplementary table 28).

347

## 348 **Discussion**

349 In this large prospective study, we observed inverse associations of dietary intakes of proline  
350 with risk of ischaemic stroke after adjustment of potential confounders, independent of the  
351 other amino acids and of total protein intake. The associations were consistent regardless of  
352 how the amino acids were modelled (i.e. percentage of protein, g/day and g/1000 kcal), and  
353 across all subgroup analyses. Although inverse associations with ischaemic stroke were  
354 initially observed for some other amino acids, these might be explained by the high  
355 correlations between these amino acids and proline, since the associations were attenuated  
356 after adjustment for proline. We further observed evidence of a higher risk of ischaemic  
357 stroke in individuals with the highest intakes of dietary glycine, and a lower risk of  
358 haemorrhagic stroke in people with higher intakes of dietary proline, though these  
359 associations differed depending on the way dietary amino acids were modelled in the  
360 analyses.

361 The present analyses provide important novel evidence on the associations between dietary  
362 amino acids and stroke risk, as only two prospective studies have previously published on the  
363 topic [5, 6]. The Swedish Mammography Cohort, with 1751 cases of total stroke (1311  
364 ischaemic and 264 haemorrhagic after 10 years), reported an inverse association between  
365 dietary cysteine and the risk of total stroke, but no other associations including for proline  
366 were observed after mutual adjustment of the amino acids [5]. In contrast to that study, we  
367 did not find an association of cystine with either stroke subtype; however, although cystine is  
368 expected to be highly correlated with cysteine, their molecular structures are different, so the  
369 two sets of results are not directly comparable. The Takayama Study in Japan, with 677  
370 deaths from stroke (393 ischaemic and 153 intracerebral haemorrhage after 16 years), showed  
371 that glutamic acid intake was inversely associated with total stroke mortality among women,  
372 while glycine intake was positively associated with ischaemic stroke mortality in men with  
373 no prior history of hypertension; the study did not report on proline [6]. In our study, we also

374 observed an inverse association of glutamic acid intake with ischaemic stroke, but this  
375 association was attenuated when we further adjusted for dietary proline. In accordance with  
376 the Takayama Study, we also found a higher risk of ischaemic stroke for people in the highest  
377 fifth of glycine intake. The differences in intakes of the amino acids across populations  
378 should be considered when comparing the findings. For example, the average intakes of both  
379 glutamic acid and glycine when expressed as a percentage of total protein in the EPIC study  
380 is closer to the lower end of the intakes reported in the Takayama study. Overall, compared to  
381 the two previous studies, the current study is over three- and ten-fold larger in case numbers.  
382 We also focused on examining ischaemic and haemorrhagic stroke separately, based on prior  
383 evidence of heterogeneity in risk factors by stroke subtypes. Overall, the associations of  
384 dietary amino acids with haemorrhagic stroke were less clear. As the number of  
385 haemorrhagic stroke cases in the study was comparatively low, further investigations in other  
386 populations with higher numbers of haemorrhagic stroke are warranted.

387 Previous studies have largely attributed the observed associations of dietary amino acids with  
388 stroke risk to the influences of the amino acids on blood pressure. The INTERMAP study  
389 reported inverse associations of glutamic acid and to a lesser degree proline [18], but positive  
390 associations of glycine intake [24], with blood pressure. Our results did not suggest an  
391 important role of blood pressure in explaining any of the findings, given that we did not  
392 observe any meaningful differences in blood pressure by amino acid intake, nor did we  
393 observe any differences in the HRs after further adjusting for blood pressure. However, blood  
394 pressure and diet in EPIC were both measured at recruitment, which does not allow the  
395 evaluation of a temporal association. Additionally, the use of blood pressure measurements  
396 assessed at a single time point as an indicator of long-term blood pressure is also prone to  
397 random measurement error, which could result in an underestimation of its role in explaining  
398 any associations between amino acid intakes and stroke risk. Furthermore, blood pressure



399 measurements in EPIC were not taken using a standardised protocol across centres [25], but  
400 our analyses were stratified by centre, so any influence on the results should be small.

401 The possible biological mechanisms for the association between proline and stroke risk are  
402 not yet well defined. Despite being non-essential amino acids, proline, glycine and  
403 hydroxyproline are the major constituents of collagen, which accounts for about one third of  
404 proteins in the human body [26]. Collagen has an important role in maintaining the structure  
405 and strength of connective tissues, cartilage and blood vessels [26, 27], and studies from  
406 animal models have suggested that endogenous synthesis of these amino acids may not be  
407 adequate for growth or collagen production [26, 28]. Because proline is the only precursor for  
408 hydroxyproline, which in turn is a precursor for glycine [26, 29], dietary intakes of proline  
409 may be of particular importance for collagen synthesis.

410 In contrast to other amino acids, proline contains an imino group in its structure instead of a  
411 primary amino group, which results in its distinctive cyclic structure and exclusion from  
412 standard amino acid metabolism [30, 31]. For this reason, the family of proline-containing  
413 peptides, collectively called glycoprolines, cannot be degraded by most peptidases owing to  
414 the presence of proline in their structures, and thus are more likely to enter the bloodstream  
415 and exert various biological effects, including possible atheroprotective or neuroprotective  
416 roles, regulation of insulin-like growth factor-I (IGF-I) homeostasis and lipid metabolism  
417 including lowering of total cholesterol [32]. Glycoprolines may be derived from collagen or  
418 IGF-Ia study in rats has shown that oral administration of cyclic glycine-proline, a  
419 glycoproline derived from IGF-I, promoted neural plasticity and remodelling in animals with  
420 focal ischaemic lesions, suggesting a neuroprotective effect of cyclic glycine-proline against  
421 ischaemic stroke or its recovery [33]. In human studies, both cyclic glycine-proline  
422 concentrations [34] and proline concentrations [35–37] have been proposed as prognostic  
423 markers of stroke recovery or stroke events. However, the directions of the changes observed

424 have been inconsistent. Other studies have also reported low correlations between dietary  
425 intake and circulating levels of proline [38]. Therefore, further research into the link between  
426 proline intake and the physiological effects of circulating proline, as well as the role of  
427 proline in both stroke incidence and prognosis (recovery or mortality) is needed.

428 Among dietary sources, the results of the present study showed that dairy products, especially  
429 cheese, was most highly correlated with proline intake. Therefore, the findings of lower risks  
430 of ischaemic stroke in people with higher proline intake in the present study are consistent  
431 with previous observations of lower ischaemic stroke risk in people with higher intake of  
432 cheese and yogurt in the same cohort [7]. Despite being a major source of saturated fat,  
433 higher intakes of dairy products have been inversely associated with cardiovascular disease  
434 outcomes in a meta-analysis of prospective studies [39], suggesting that some components in  
435 cheese or dairy products might be protective. For example, studies had suggested that the  
436 specific saturated fatty acid isomer composition of different foods [40], or the calcium [41] or  
437 probiotics content [42] of dairy foods may account for their associations with stroke risk. As  
438 the observed association for proline remained upon adjustment for cheese and other food  
439 sources, the findings of the present study suggest that the amino acid profiles of dairy  
440 products and their associations with CVD warrant further research. Meanwhile, dietary intake  
441 of glycine was strongly correlated with red meat intake, which was previously found to be  
442 modestly but positively associated with ischaemic stroke risk in EPIC, though this association  
443 was attenuated after adjustment for fibre intake [7]. Further population-based and mechanistic  
444 studies are needed to replicate the observed associations between dietary amino acids and  
445 risks of stroke subtypes, prior to investigating any implications for potential dietary  
446 interventions.

447 The chief strengths of this study include the large sample size with participants recruited from  
448 seven European countries, the prospective design and prolonged duration of follow-up. EPIC

449 is also a well-characterised cohort with extensive dietary and lifestyle/health behavioural  
450 data, allowing us to examine estimated intakes of 19 dietary amino acids with stroke risk,  
451 while adjusting for multiple confounders. The ascertainment of stroke cases in this cohort  
452 was either completely or partially validated depending on EPIC country, and previous dietary  
453 analyses have found no heterogeneity in the associations by the extent of stroke validation  
454 [7]. To adjust for potential bias due to differences between the country-specific dietary  
455 questionnaires, we also applied calibration to the dietary data using additional standardised  
456 24-hour recalls to reduce between-centre heterogeneity and to reduce measurement error. The  
457 study also had several limitations. Diet was ascertained using a single dietary questionnaire  
458 collected at baseline, which meant that we were not able to account for dietary changes  
459 during follow-up. We were unable to assess the associations of dietary glutamine, asparagine  
460 or cysteine with stroke risk, as estimates of these amino acids were not available from the  
461 USDA database. The matching of amino acids data based on a single US database in different  
462 countries across Europe may also be a limitation, and the absolute validity of the amino acid  
463 estimates assessed using FFQs and 24-hour recalls is not known, although good agreement  
464 and thus relative validity has been shown for estimates of total energy and protein intakes  
465 between the USDA and country-specific databases in the previous validation study [14].  
466 Because of the large number of tests conducted, false positive findings due to chance are  
467 possible, but we focused on the findings that survived correction for multiple testing. We also  
468 conducted analyses further adjusting for each one of the other amino acids, which given their  
469 high correlations might constitute over-adjustment, but this approach also helped highlight  
470 the clear associations with proline. As with any observational study, the present study could  
471 not establish causality, and cannot fully exclude residual confounding or reverse causation.  
472 However, we assessed the former by comparing the changes in  $\chi^2$  statistics across models,  
473 and limited the latter possibility by our sensitivity analysis excluding the first four years of

474 follow-up. Information on other potential mediators such as cholesterol concentrations was  
475 only available in a small subset of participants at study baseline, so we were unable to access  
476 their potential effects. Lastly, the present study was largely restricted to white European  
477 individuals, therefore the findings may not be generalisable to other populations which have  
478 different sources of protein intake and dietary amino acid profiles, as well as genetic  
479 differences.

480

## 481 **Conclusions**

482 This large study demonstrated an inverse association of both absolute intake and relative  
483 proportions of dietary proline with risk of ischaemic stroke, independent of the other amino  
484 acids. The suggestive associations of lower risk of haemorrhagic stroke in people with higher  
485 proline intake, and higher risk of ischaemic stroke in people with higher proportions of  
486 glycine intake, also warrant further investigation. These observations were largely  
487 unexplained by differences in blood pressure. Further research is needed from both large-  
488 scale population-based studies and mechanistic studies to replicate these findings, in addition  
489 to genetic studies and intervention trials to assess the causal relevance of these associations  
490 and possible implications for prevention.

491 *Acknowledgments:* The authors thank all participants in the EPIC cohort for their invaluable  
492 contribution to the study.

493 *Authors' contributions:* The study was conceived and designed by TYNT and TJK with input  
494 from all other authors. TYNT analysed the data and wrote the first draft of the manuscript,  
495 with input from TJK, RC, JAS, IH, UN, NGF, FI, RCT, EW, KA, CCD and YTVS. All other  
496 authors provided the data and revised the manuscript critically for important intellectual  
497 content. TYNT had primary responsibility for final content. All authors read and approved the  
498 final manuscript.

499 *Disclaimer:* Where authors are identified as personnel of the International Agency for  
500 Research on Cancer / World Health Organization, the authors alone are responsible for the  
501 views expressed in this article and they do not necessarily represent the decisions, policy or  
502 views of the International Agency for Research on Cancer / World Health Organization.

503 *Conflicts of interest:* The authors have no conflicts of interest to declare.

504 *Funding:* This work was supported by a Nuffield Department of Population Health  
505 Fellowship (TYNT), the UK Medical Research Council (MR/M012190/1), Cancer Research  
506 UK (C8221/A19170 and 570/A16491), and the Wellcome Trust (Our Planet Our Health,  
507 Livestock Environment and People 205212/Z/16/Z). EPIC-CVD has been supported by the  
508 European Union Framework 7 (HEALTH-F2-2012-279233), the European Research Council  
509 (268834), the UK Medical Research Council (G0800270 and MR/L003120/1), the British  
510 Heart Foundation (SP/09/002 and RG/08/014 and RG13/13/30194), and the UK National  
511 Institute of Health Research. The establishment of the study subcohort was supported by the  
512 EU Sixth Framework Programme (FP6) (grant LSHM\_CT\_2006\_037197 to the InterAct  
513 project) and the Medical Research Council Epidemiology Unit (grants MC\_UU\_12015/1 and  
514 MC\_UU\_12015/5). The coordination of the European Prospective Investigation into Cancer

515 and Nutrition (EPIC) is financially supported by International Agency for Research on  
516 Cancer (IARC) and also by the Department of Epidemiology and Biostatistics, School of  
517 Public Health, Imperial College London which has additional infrastructure support provided  
518 by the NIHR Imperial Biomedical Research Centre (BRC). The national cohorts are  
519 supported by: Danish Cancer Society (Denmark); Ligue Contre le Cancer, Institut Gustave  
520 Roussy, Mutuelle Générale de l'Éducation Nationale, Institut National de la Santé et de la  
521 Recherche Médicale (INSERM) (France); German Cancer Aid, German Cancer Research  
522 Center (DKFZ), German Institute of Human Nutrition Potsdam-Rehbruecke (DIfE), Federal  
523 Ministry of Education and Research (BMBF) (Germany); Associazione Italiana per la  
524 Ricerca sul Cancro-AIRC-Italy, Compagnia di SanPaolo and National Research Council  
525 (Italy); Dutch Ministry of Public Health, Welfare and Sports (VWS), LK Research Funds,  
526 Dutch Prevention Funds, Dutch ZON (Zorg Onderzoek Nederland), World Cancer Research  
527 Fund (WCRF) (The Netherlands), and Statistics Netherlands is acknowledged for providing  
528 the causes of death; Health Research Fund (FIS) - Instituto de Salud Carlos III (ISCIII),  
529 Regional Governments of Andalucía, Asturias, Basque Country, Murcia and Navarra, and the  
530 Catalan Institute of Oncology - ICO (Spain); Swedish Cancer Society, Swedish Research  
531 Council and County Councils of Skåne and Västerbotten and the funds supporting the  
532 Northern Sweden Diet Database (Sweden); Cancer Research UK (14136 to EPIC-Norfolk;  
533 C8221/A29017 to EPIC-Oxford), Medical Research Council (1000143 to EPIC-Norfolk;  
534 MR/M012190/1 to EPIC-Oxford) (United Kingdom). The funders had no role in the design  
535 of the study; in the collection, analyses, or interpretation of data; in the writing of the  
536 manuscript; or in the decision to publish the results.

537 *Data sharing:* For information on how to submit an application for gaining access to EPIC  
538 data and/or biospecimens, please follow the instructions at <http://epic.iarc.fr/access/index.php>

## 539 **References**

- 540 1. Feigin VL, Stark BA, Johnson CO, et al (2021) Global, regional, and national burden  
541 of stroke and its risk factors, 1990-2019: A systematic analysis for the Global Burden  
542 of Disease Study 2019. *Lancet Neurol* 20:1–26. [https://doi.org/10.1016/S1474-4422\(21\)00252-0](https://doi.org/10.1016/S1474-4422(21)00252-0)  
543
- 544 2. Zhang Z, Xu G, Yang F, et al (2014) Quantitative analysis of dietary protein intake and  
545 stroke risk. *Neurology* 83:19–25. <https://doi.org/10.1212/WNL.0000000000000551>
- 546 3. Zhang XW, Yang Z, Li M, et al (2016) Association between dietary protein intake and  
547 risk of stroke: A meta-analysis of prospective studies. *Int J Cardiol* 223:548–551.  
548 <https://doi.org/10.1016/j.ijcard.2016.08.106>
- 549 4. Górska-Warsewicz H, Laskowski W, Kulykovets O, et al (2018) Food Products as  
550 Sources of Protein and Amino Acids-The Case of Poland. *Nutrients* 10:.  
551 <https://doi.org/10.3390/nu10121977>
- 552 5. Larsson SC, Håkansson N, Wolk A (2015) Dietary Cysteine and Other Amino Acids  
553 and Stroke Incidence in Women. *Stroke* 46:922–6.  
554 <https://doi.org/10.1161/STROKEAHA.114.008022>
- 555 6. Nagata C, Wada K, Tamura T, et al (2015) Dietary intakes of glutamic acid and  
556 glycine are associated with stroke mortality in Japanese adults. *J Nutr* 145:720–728.  
557 <https://doi.org/10.3945/jn.114.201293>
- 558 7. Tong TYN, Appleby PN, Key TJ, et al (2020) The associations of major foods and  
559 fibre with risks of ischaemic and haemorrhagic stroke: a prospective study of 418 329  
560 participants in the EPIC cohort across nine European countries. *Eur Heart J* 44:1–11.  
561 <https://doi.org/10.1093/eurheartj/ehaa007>
- 562 8. Sun L, Clarke R, Bennett D, et al (2019) Causal associations of blood lipids with risk  
563 of ischemic stroke and intracerebral hemorrhage in Chinese adults. *Nat Med* 25:569–  
564 574. <https://doi.org/10.1038/s41591-019-0366-x>
- 565 9. Price AJ, Wright FL, Green J, et al (2018) Differences in risk factors for 3 types of  
566 stroke: UK prospective study and meta-analyses. *Neurology* 90:e298–e306.  
567 <https://doi.org/10.1212/WNL.0000000000004856>
- 568 10. Riboli E, Hunt K, Slimani N, et al (2002) European Prospective Investigation into  
569 Cancer and Nutrition (EPIC): study populations and data collection. *Public Health*  
570 *Nutr* 5:1113. <https://doi.org/10.1079/PHN2002394>
- 571 11. Danesh J, Saracci R, Berglund G, et al (2007) EPIC-Heart: The cardiovascular  
572 component of a prospective study of nutritional, lifestyle and biological factors in  
573 520,000 middle-aged participants from 10 European countries. *Eur J Epidemiol*  
574 22:129–141. <https://doi.org/10.1007/s10654-006-9096-8>
- 575 12. Slimani N, Ferrari P, Ocké M, et al (2000) Standardization of the 24-hour diet recall  
576 calibration method used in the European Prospective Investigation into Cancer and  
577 Nutrition (EPIC): general concepts and preliminary results. *Eur J Clin Nutr* 54:900–17
- 578 13. Ferrari P, Day NE, Boshuizen HC, et al (2008) The evaluation of the diet/disease  
579 relation in the EPIC study: considerations for the calibration and the disease models.  
580 *Int J Epidemiol* 37:368–378. <https://doi.org/10.1093/ije/dym242>



- 581 14. Iguacel I, Perez-Cornago A, Schmidt JA, et al (2022) Evaluation of protein and amino  
582 acid intake estimates from the EPIC dietary questionnaires and 24-h dietary recalls  
583 using different food composition databases. *Nutr Metab Cardiovasc Dis* 32:80–89.  
584 <https://doi.org/10.1016/j.numecd.2021.09.012>
- 585 15. Lenders CM, Liu S, Wilmore DW, et al (2009) Evaluation of a novel food composition  
586 database that includes glutamine and other amino acids derived from gene sequencing  
587 data. *Eur J Clin Nutr* 63:1433–1439. <https://doi.org/10.1038/ejcn.2009.110>
- 588 16. Mustănea G, Ungureanu EL, Iorga E (2019) Protein acidic hydrolysis for amino acids  
589 analysis in food - progress over time: A short review. *J Hyg Eng Des* 26:81–87
- 590 17. National Center for Biotechnology Information (2022) PubChem Compound Summary  
591 for CID 595, Cystine. <https://pubchem.ncbi.nlm.nih.gov/compound/Cystine>. Accessed  
592 11 Feb 2022
- 593 18. Stamler J, Brown IJ, Daviglus ML, et al (2009) Glutamic acid, the main dietary amino  
594 acid, and blood pressure: The intermap study (international collaborative study of  
595 macronutrients, micronutrients and blood pressure). *Circulation* 120:221–228.  
596 <https://doi.org/10.1161/CIRCULATIONAHA.108.839241>
- 597 19. Ibsen DB, Laursen ASD, Würtz AML, et al (2021) Food substitution models for  
598 nutritional epidemiology. *Am J Clin Nutr* 113:294–303.  
599 <https://doi.org/10.1093/ajcn/nqaa315>
- 600 20. Floud S, Balkwill A, Moser K, et al (2016) The role of health-related behavioural  
601 factors in accounting for inequalities in coronary heart disease risk by education and  
602 area deprivation: prospective study of 1.2 million UK women. *BMC Med* 14:145.  
603 <https://doi.org/10.1186/s12916-016-0687-2>
- 604 21. Gao X, Starmer J, Martin ER (2008) A multiple testing correction method for genetic  
605 association studies using correlated single nucleotide polymorphisms. *Genet  
606 Epidemiol* 32:361–369. <https://doi.org/10.1002/gepi.20310>
- 607 22. Adams CD, Richmond R, Santos Ferreira DL, et al (2019) Circulating metabolic  
608 biomarkers of screen-detected prostate cancer in the ProtecT study. *Cancer Epidemiol  
609 Biomarkers Prev* 28:208–216. <https://doi.org/10.1158/1055-9965.EPI-18-0079>
- 610 23. Arnold M (2020) Jasper: Jasper makes plots. 2020.  
611 <https://github.com/arnhew99/Jasper>
- 612 24. Stamler J, Brown IJ, Daviglus ML, et al (2013) Dietary glycine and blood pressure:  
613 The international study on macro/micronutrients and blood pressure. *Am J Clin Nutr*  
614 98:136–145. <https://doi.org/10.3945/ajcn.112.043000>
- 615 25. Schulze MB, Kroke A, Saracci R, Boeing H (2002) The effect of differences in  
616 measurement procedure on the comparability of blood pressure estimates in multi-  
617 centre studies. *Blood Press Monit* 7:95–104. [https://doi.org/10.1097/00126097-  
618 200204000-00002](https://doi.org/10.1097/00126097-200204000-00002)
- 619 26. Li P, Wu G (2018) Roles of dietary glycine, proline, and hydroxyproline in collagen  
620 synthesis and animal growth. *Amino Acids* 50:29–38. [https://doi.org/10.1007/s00726-  
621 017-2490-6](https://doi.org/10.1007/s00726-017-2490-6)
- 622 27. Xu J, Shi G-P (2014) Vascular wall extracellular matrix proteins and vascular diseases.  
623 *Biochim Biophys Acta* 1842:2106–2119. <https://doi.org/10.1016/j.bbadis.2014.07.008>



- 624 28. Hou Y, Yao K, Yin Y, Wu G (2016) Endogenous synthesis of amino acids limits  
625 growth, lactation, and reproduction in animals. *Adv Nutr* 7:331–342.  
626 <https://doi.org/10.3945/an.115.010850>
- 627 29. Wu G, Bazer FW, Burghardt RC, et al (2011) Proline and hydroxyproline metabolism:  
628 Implications for animal and human nutrition. *Amino Acids* 40:1053–1063.  
629 <https://doi.org/10.1007/s00726-010-0715-z>
- 630 30. Phang JM, Donald SP, Pandhare J, Liu Y (2008) The metabolism of proline, a stress  
631 substrate, modulates carcinogenic pathways. *Amino Acids* 35:681–690.  
632 <https://doi.org/10.1007/s00726-008-0063-4>
- 633 31. Wyse ATS, Netto CA (2011) Behavioral and neurochemical effects of proline. *Metab*  
634 *Brain Dis* 26:159–172. <https://doi.org/10.1007/s11011-011-9246-x>
- 635 32. Misiura M, Milyk W (2019) Proline-containing peptides-New insight and  
636 implications: A Review. *Biofactors* 45:857–866. <https://doi.org/10.1002/biof.1554>
- 637 33. Kaneko H, Namihira M, Yamamoto S, et al (2022) Oral administration of cyclic  
638 glycyl-proline facilitates task learning in a rat stroke model. *Behav Brain Res*  
639 417:113561. <https://doi.org/10.1016/j.bbr.2021.113561>
- 640 34. Fan D, Krishnamurthi R, Harris P, et al (2019) Plasma cyclic glycine proline/IGF-1  
641 ratio predicts clinical outcome and recovery in stroke patients. *Ann Clin Transl Neurol*  
642 6:669–677. <https://doi.org/10.1002/acn3.743>
- 643 35. Goulart VAM, Sena MM, Mendes TO, et al (2019) Amino acid biosignature in plasma  
644 among ischemic stroke subtypes. *Biomed Res Int* 2019:.  
645 <https://doi.org/10.1155/2019/8480468>
- 646 36. Szpetnar M, Hordyjewska A, Malinowska I, et al (2016) The fluctuation of free amino  
647 acids in serum during acute ischemic stroke. *Curr Issues Pharm Med Sci* 29:151–154.  
648 <https://doi.org/10.1515/cipms-2016-0031>
- 649 37. Wang X, Zhang L, Sun W, et al (2021) Changes of Metabolites in Acute Ischemic  
650 Stroke and Its Subtypes. *Front Neurosci* 14:1–8.  
651 <https://doi.org/10.3389/fnins.2020.580929>
- 652 38. Iguacel I, Schmidt JA, Perez-Cornago A, et al (2021) Associations between dietary  
653 amino acid intakes and blood concentration levels. *Clin Nutr* 40:3772–3779.  
654 <https://doi.org/10.1016/j.clnu.2021.04.036>
- 655 39. Alexander DD, Bylsma LC, Vargas AJ, et al (2016) Dairy consumption and CVD: a  
656 systematic review and meta-analysis. *Br J Nutr* 115:737–750.  
657 <https://doi.org/10.1017/S0007114515005000>
- 658 40. Steur M, Johnson L, Sharp SJ, et al (2021) Dietary fatty acids, macronutrient  
659 substitutions, food sources and incidence of coronary heart disease: Findings from the  
660 EPIC-CVD case-cohort study across nine european countries. *J Am Heart Assoc* 10:.  
661 <https://doi.org/10.1161/JAHA.120.019814>
- 662 41. Lorenzen JK, Astrup A (2011) Dairy calcium intake modifies responsiveness of fat  
663 metabolism and blood lipids to a high-fat diet. *Br J Nutr* 105:1823–1831.  
664 <https://doi.org/10.1017/S0007114510005581>
- 665 42. Mozaffarian D, Wu JHY (2018) Flavonoids, dairy foods, and cardiovascular and

666 metabolic health: A review of emerging biologic pathways. *Circ Res* 122:369–384.  
667 <https://doi.org/10.1161/CIRCRESAHA.117.309008>  
668

Table 1: Participant characteristics at recruitment by sex in the EPIC study

| Participant characteristics                                                         | Men              | Women           |
|-------------------------------------------------------------------------------------|------------------|-----------------|
| Number of participants                                                              | 129,005          | 227,137         |
| Age, years, mean (SD)                                                               | 52.1 (9.9)       | 50.6 (10.8)     |
| Current smokers, n (%)                                                              | 36,561 (28.3%)   | 48,287 (21.3%)  |
| Moderately active or active, n (%)                                                  | 63,284 (49.1%)   | 91,104 (40.1%)  |
| Employed or student, n (%)                                                          | 85,841 (66.5%)   | 124,753 (54.9%) |
| Vocational or university degree, n (%)                                              | 67,344 (52.2%)   | 109,160 (48.1%) |
| Alcohol consumption $\geq 15.0$ g/day, n (%)                                        | 60,989 (47.2%)   | 42,452 (18.7%)  |
| Alcohol consumption, g/day, median (25 <sup>th</sup> , 75 <sup>th</sup> percentile) | 13.8 (4.5, 31.4) | 4.0 (0.6, 12.4) |
| Overweight or obese (BMI $\geq 25.0$ kg/m <sup>2</sup> ), n (%)                     | 81,921 (63.5%)   | 107,011 (47.1%) |
| BMI, kg/m <sup>2</sup> , mean (SD)                                                  | 26.5 (3.6)       | 25.5 (4.5)      |
| History of diabetes, n (%)                                                          | 3,981 (3.1%)     | 4,668 (2.1%)    |
| History of hypertension, n (%)                                                      | 24,828 (19.2%)   | 41,442 (18.2%)  |
| History of hyperlipidaemia, n (%)                                                   | 21,093 (16.4%)   | 24,149 (10.6%)  |
| Total protein intake, g/day, mean (SD)                                              | 90.0 (26.6)      | 74.9 (21.4)     |
| Total energy intake, kcal/day, mean (SD)                                            | 2444.5 (634.8)   | 1965.9 (517.4)  |

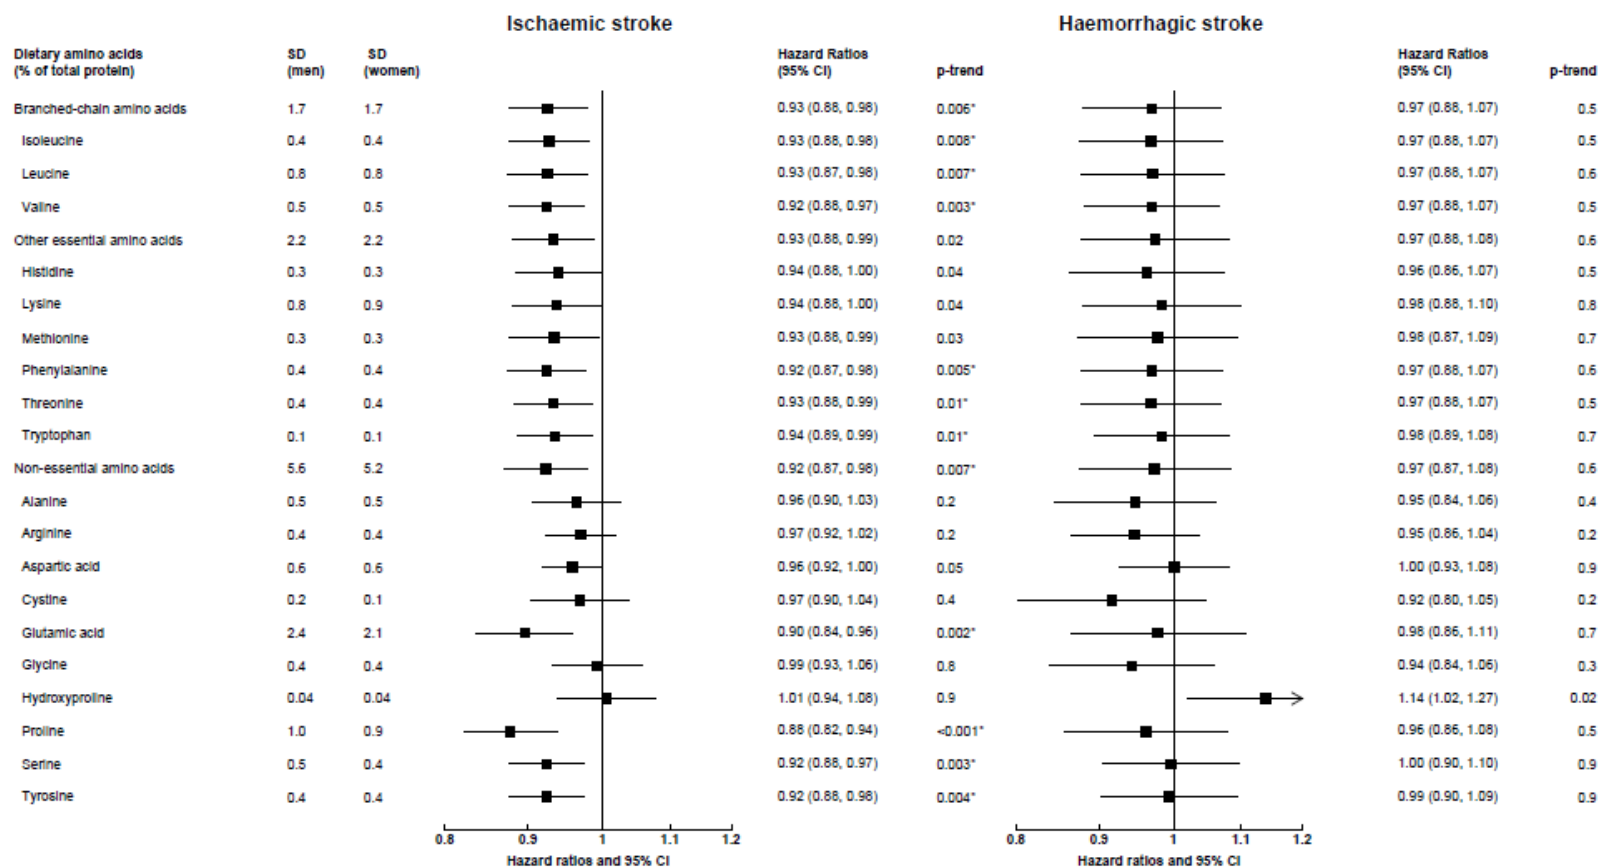

Figure 1 Hazard ratios (95% confidence intervals) for ischaemic (4295 cases) and haemorrhagic stroke (1375 cases) by increments of calibrated intakes of dietary amino acids (as percent of total protein).

Hazard ratios modelled per 1 sex-specific SD increment in dietary amino acids, expressed as percent of total protein. The model was stratified by sex and centre, and adjusted for age, calibrated energy intake, smoking, calibrated alcohol consumption, physical activity, employment status, highest level of education completed, history of diabetes, prior hypertension, prior hyperlipidaemia, body mass index. Estimates with an asterisk denote ones which were statistically significant after correcting for multiple testing.

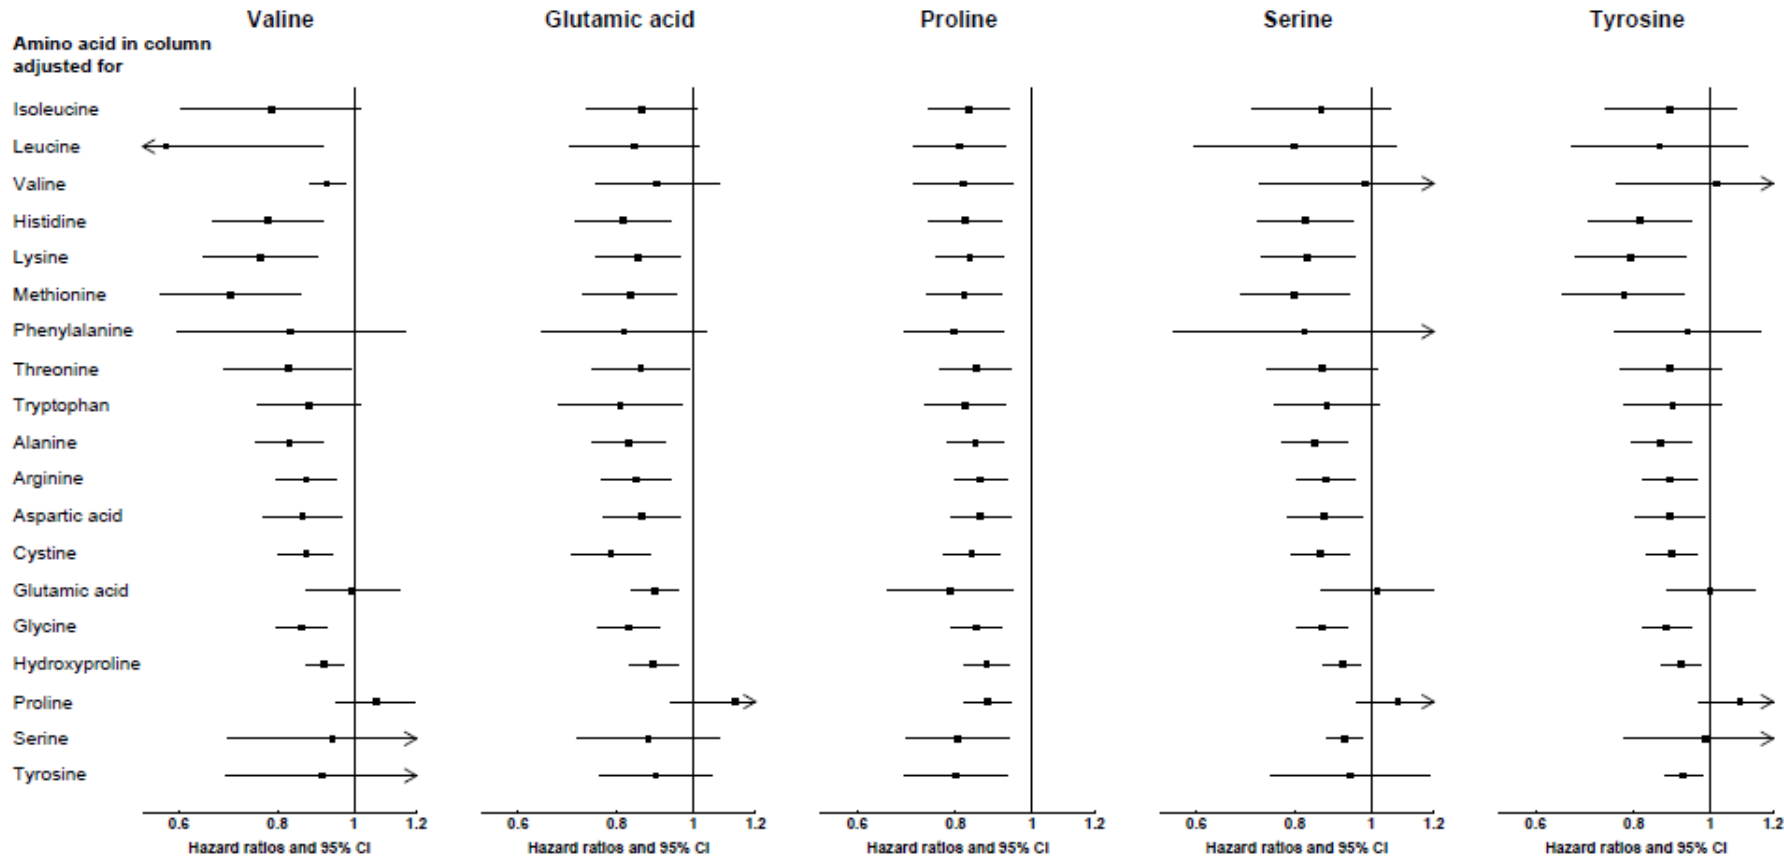

Figure 2 Hazard ratios (95% confidence intervals) for the association between selected dietary amino acids and ischaemic stroke (4295 cases), with mutual adjustment for each of the other amino acids.

Results are shown for amino acids which were statistically significantly associated with ischemic stroke in both calibrated and uncalibrated analyses. Hazard ratios modelled per 1 sex-spe SD (as shown in Figure 1) increment in dietary amino acids in column heading, expressed as percent of total protein, with multivariable adjustment plus amino acid on the left panel. If the amino acid in column and in left panel are the same, the result is interpretable as the hazard ratio for the amino acid based on the multivariable adjusted model.

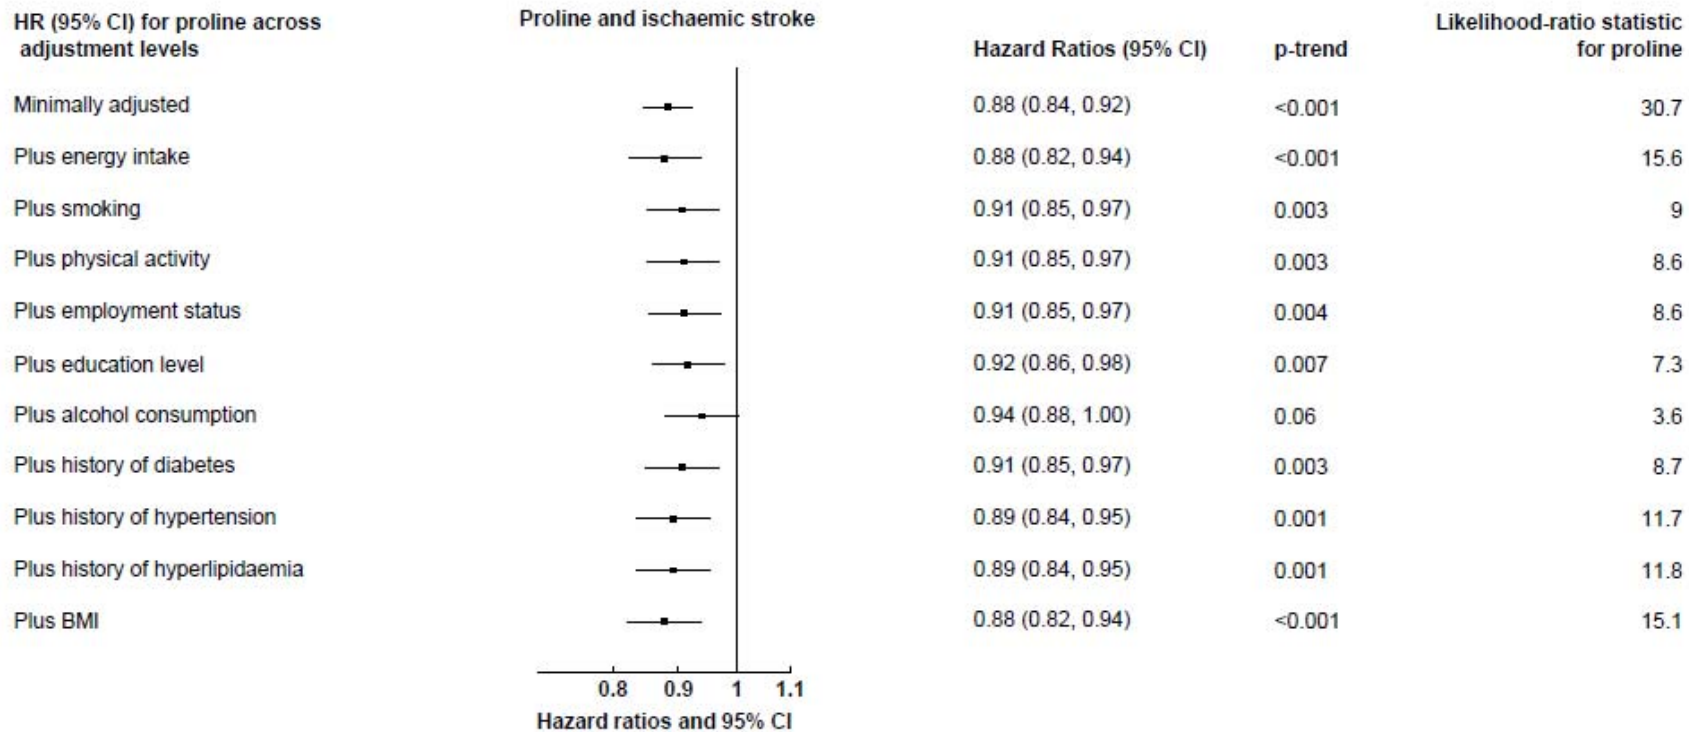

Figure 3 Hazard ratios (95% confidence intervals) for the association between dietary proline and ischaemic stroke (4295 cases), with additional adjustment each covariate.

Hazard ratios modelled per 1 SD increment (1 SD=1.0 in men, 0.9 in women) in calibrated proline intake, expressed as percent of total protein. The minimally adjusted model was stratified by sex and centre, and adjusted for age (continuous). The likelihood-ratio test statistic for proline is the  $\chi^2$  statistic based on a likelihood ratio test comparing models with and without proline at the varying levels of covariate adjustment. The changes in the  $\chi^2$  statistic across models could be interpreted as a measure of the extent to which the covariates could account for any associations between proline and ischaemic stroke risk.
